# Supplementary material
Source: PubMed Central journal article supplement (PMC4293137)
Supplement: Supp_Data.pdf [file Supp_Data.pdf]

## Supplementary Data

### SEM Images of Cell-Embedded Scaffold

We captured scanning electron microscope (SEM) images of the mouse embryonic stem cell (mESC)-embedded collagen scaffold 4 days postseeding. In addition to Figure 2 (in

the article), higher-magnification images showing the embryoid body (EB) structures within the scaffold pores are presented here.

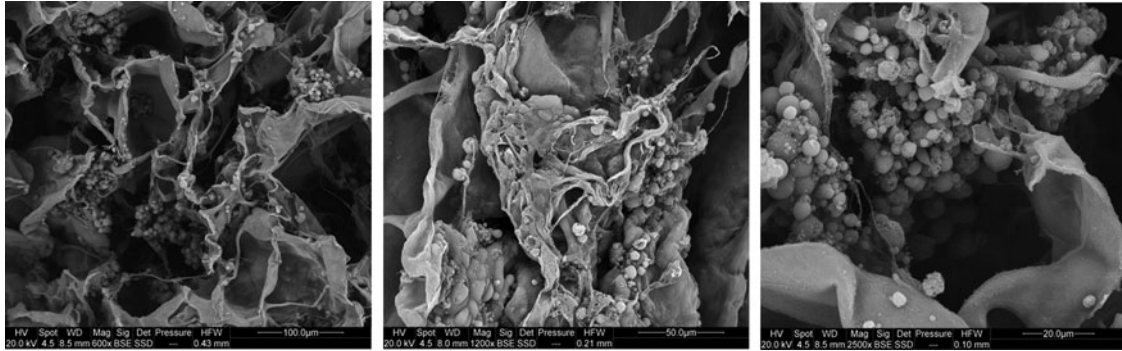

**SUPPLEMENTARY FIG. S1.** Collagen scaffold scanning electron microscopic (SEM) images.

### Examined Genes Representative of the Three Germ Layers

**SUPPLEMENTARY TABLE S1.** GENES ANALYZED FOR EACH GERM LAYER

| <i>Germ layer</i> | <i>Gene</i>                                             | <i>Applied Biosystems assay</i> | <i>Amplicon length</i> |
|-------------------|---------------------------------------------------------|---------------------------------|------------------------|
| Primitive streak  | <i>Bry</i> (T, brachyury homolog)                       | Mm00436877_m1                   | 86                     |
| Ectoderm          | <i>Pax6</i> (paired box 6)                              | Mm00443072_m1                   | 56                     |
|                   | <i>Nestin</i>                                           | Mm00450205_m1                   | 72                     |
| Mesoderm          | <i>Flk1</i> ( <i>fetal liver kinase 1</i> )             | Mm01222421_m1                   | 64                     |
| Endoderm          | <i>Sox17</i> (sex determining region Y-box 17)          | Mm00488363_m1                   | 86                     |
| Control           | <i>GAPDH</i> (glyceraldehyde 3-phosphate dehydrogenase) | Mm9999915_g1                    | 107                    |

### Real-Time Polymerase Chain Reaction Analysis on Day 2

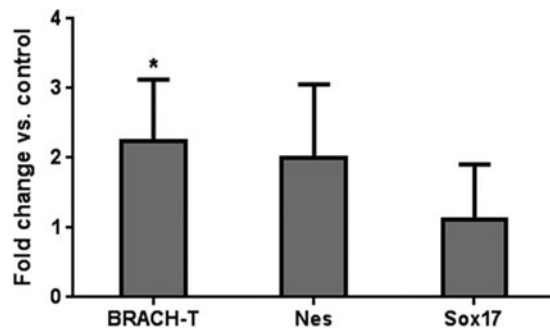

**SUPPLEMENTARY FIG. S2.** Gene expression of mouse embryonic stem cells (mESCs) 2 days postseeding under cyclic stretching.

## TaqMan® Array Custom Micro Fluidic Card

Examined genes are specifically associated with pluripotency and stemness or differentiation to ectoderm, me-

soderm, or endoderm. The following list presents the 96 analyzed gene, where upregulated (red) or downregulated (green) genes were marked when the change was observed in more than 20% of at least three of four experiments.

| Gene   | Fold change (Osc/Static) | Gene   | Fold change (Osc/Static) | Gene    | Fold change (Osc/Static) | Gene      | Fold change (Osc/Static) |
|--------|--------------------------|--------|--------------------------|---------|--------------------------|-----------|--------------------------|
| 18S    |                          | Foxd3  |                          | LAMB1   |                          | RAF1      |                          |
| ACTB   |                          | Gabrb3 |                          | Lamb1-1 |                          | REST      |                          |
| Actc1  | Red                      | GAL    |                          | LAMC1   |                          | Runx2     | Green                    |
| Afp    | Green                    | GAPDH  |                          | LEFTY1  |                          | SEMA3A    |                          |
| BXDC2  |                          | GATA4  |                          | LEFTY2  |                          | Serpina1a | Green                    |
| CD34   |                          | GATA6  |                          | Lifr    | Green                    | SFRP2     |                          |
| Cd9    | Green                    | GBX2   |                          | LIN28   |                          | SOX17     |                          |
| CDH5   |                          | Gcg    | Green                    | Myf5    | Red                      | SOX2      |                          |
| CDX2   |                          | Gcm1   | Red                      | MYOD1   |                          | Sst       | Red                      |
| Col1a1 | Green                    | GDF3   |                          | NANOG   |                          | SYCP3     |                          |
| Col2a1 | Red                      | Gfap   | Green                    | NES     |                          | SYP       |                          |
| Commd3 | Green                    | GRB7   |                          | NEUROD1 |                          | T         | Red                      |
| Crabp2 | Green                    | HBB    |                          | NODAL   |                          | TAT       |                          |
| CTNNB1 |                          | Hbz    | Green                    | NOG     |                          | Tcfcp2l1  | Green                    |
| DDX4   |                          | HLXB9  |                          | NPPA    |                          | Tdgf1     | Green                    |
| DES    |                          | IFITM1 |                          | NR5A2   |                          | TERT      |                          |
| DNMT3B |                          | IFITM2 |                          | NR6A1   |                          | TH        |                          |
| EEF1A1 |                          | IGFBP2 |                          | Olig2   | Green                    | UTF1      |                          |
| Eomes  | Green                    | IL6ST  |                          | Pax4    |                          | Wt1       | Red                      |
| Eras   | Green                    | INS2   |                          | PAX6    |                          | Xist      | Green                    |
| Fgf4   | Green                    | IPF1   |                          | PECAM1  |                          | ZFP42     |                          |
| FGF5   | Green                    | ISL1   |                          | Podxl   | Green                    |           |                          |
| Flt1   | Green                    | KIT    |                          | POU5F1  |                          |           |                          |
| Fn1    | Green                    | KRT1   |                          | PTEN    |                          |           |                          |
| FOXA2  |                          | Lama1  | Green                    | PTF1A   |                          |           |                          |

SUPPLEMENTARY FIG. S3. TaqMan list of genes.

The following differentiation-associated genes were up-regulated, and we elaborate their path in early differentiation of mESCs.

*Actc1*: related to early cardiac differentiation<sup>1</sup>

*Col2a1*: related to chondrogenesis<sup>2</sup>

*Gcm1*: related to trophodermal differentiation<sup>3</sup>

*Myf5*: related to myogenic mesodermal<sup>4</sup>

*Sst*: related to endocrine cell<sup>5</sup>

*Wt1*: key regulator of mesenchyme to epithelial balance in the development of certain mesodermal organs and responsible for mesenchyme maintenance<sup>6</sup>

In the article (Fig. 5) we present the gene enrichment map correlating the changes in the examined genes with biological processes.

## Viability of Cells Under Stretch Forces

To assess cell viability in the 3D scaffolds, constructs were loaded with calcein acetoxymethyl ester (calcein AM; 1 μM), which stains live cells, and with ethidium homodimer-1 (4 μM) (Sigma-Aldrich, St. Louis, MO), which stains dead cells, for 30 min at 37°C. Scaffolds were visualized using a confocal microscope. Viability quantification was performed using MATLAB (The Mathworks, Natick, MA). The total number of live (labeled in green) and dead (labeled in red) cells was quantified as the number of green/red pixels in the image and viability was determined as number of live cells divided by the total number of cells.

The following figure presents fluorescence images of scaffolds with cells.

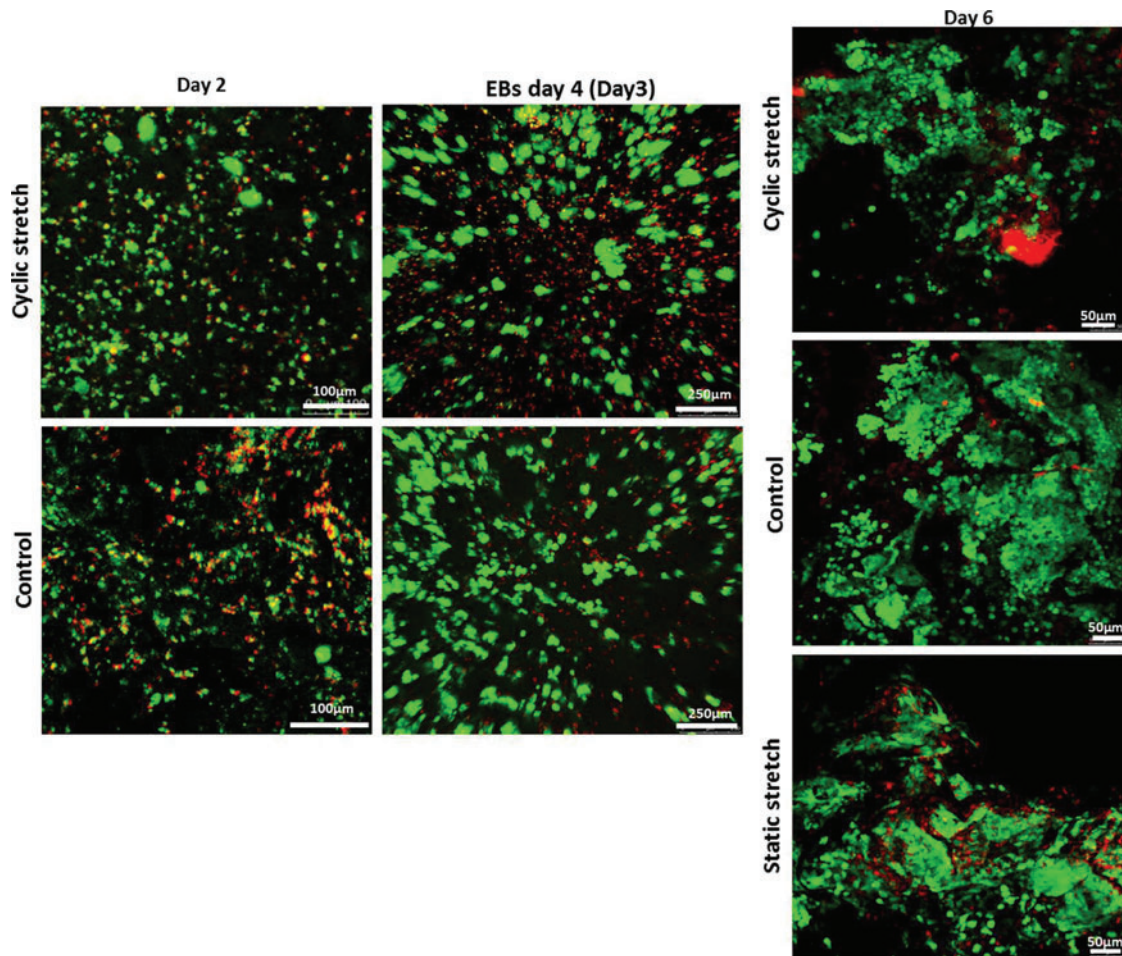

**SUPPLEMENTARY FIG. S4.** Viability test for mESCs under stretch forces: green, live cells; red, dead cells.

Note that in the EB state, the cells were not entirely separated to single cells; therefore, in some cases, green dots present groups of cells.

Quantification of the images demonstrated high percentages (>80%) of viability under all conditions, as summarized in the following table.

|                | Day 2       | EBs day 4    | Day 6        |
|----------------|-------------|--------------|--------------|
| Cyclic stretch | 83.33       | 79.41 ± 1.83 | 90.71 ± 5.29 |
| Control        | 81.6 ± 3.62 | 91.29 ± 0.85 | 98.68 ± 0.42 |

EBs, embryoid bodies.

## References

1. Takeuchi, J.K., and Bruneau, B.G. Directed transdifferentiation of mouse mesoderm to heart tissue by defined factors. *Nature* **459**, 708, 2009.
2. Waese, E.Y., and Stanford, W.L. One-step generation of murine embryonic stem cell-derived mesoderm progenitors and chondrocytes in a serum-free monolayer differentiation system. *Stem Cell Res* **6**, 34, 2011.
3. Matin, M.M., Walsh, J.R., Gokhale, P.J., Draper, J.S., Bahrami, A.R., Morton, I., Moore, H.D., and Andrews, P.W. Specific knockdown of Oct4 and beta2-microglobulin expression by RNA interference in human embryonic stem cells and embryonic carcinoma cells. *Stem Cells* **22**, 659, 2004.
4. Sakurai, H., Sakaguchi, Y., Shoji, E., Nishino, T., Maki, I., Sakai, H., Hanaoka, K., Kakizuka, A., and Sehara-Fujisawa, A. *In vitro* modeling of paraxial mesodermal progenitors derived from induced pluripotent stem cells. *PLoS One* **7**, e47078, 2012.
5. Takeuchi, H., Nakatsuji, N., and Suemori, H. Endodermal differentiation of human pluripotent stem cells to insulin-producing cells in 3D culture. *Sci Rep* **4**, 4488, 2014.
6. Chau, Y.Y., and Hastie, N.D. The role of Wt1 in regulating mesenchyme in cancer, development, and tissue homeostasis. *Trends Genet* **28**, 515, 2012.
